# Supplementary material
Source: publisher figshare collection journal article supplement (https://acs.figshare.com/ndownloader/files/7578466)
Supplement: Supplementary file 1 [file 7578466]

70
Coordinates from ORCA-job PdL
  H   -3.16397712571715     -3.94966279481174      6.30374674495797
  H   -4.61340996382976     -3.40374792084757      5.43278826679234
  C   -1.45657537783909      0.16484775555663      4.94251264679614
  C   0.02647233771267      0.01799699076902      1.76785729416177
  C   -1.49709606875027      0.34202434930322      6.33084721622530
  C   -0.32545202892125      0.48600514848620      7.07550230587749
  C   0.91596329939406      0.45209271188285      6.43809494412231
  C   1.01707435710906      0.27792958990650      5.05242153742071
  C   2.36034870101364      0.23709934105299      4.38776522907670
  C   2.89653136202515      1.40993064882546      3.80137542908285
  C   4.17977139770574      1.35629960358650      3.24133531315881
  C   4.92047798593716      0.17709425205287      3.24598393319805
  C   4.37846290233995     -0.97588371856345      3.80730669370390
  C   3.09907343747913     -0.97148551095100      4.38015860037989
  C   2.54408894164233     -2.26798073529034      4.96134346387986
  C   2.45427242417914     -3.37523129048342      3.89517092370750
  C   3.35942314037365     -2.74082796492988      6.17862761115675
  C   2.13484071475424      2.73112764613713      3.78320839293775
  C   2.78961416003581      3.76246883719396      4.72153039641714
  C   1.98673894172724      3.29699382119076      2.35926199568138
  C   -2.72443225811487      0.00958503998454      4.15723961881862
  H   -3.83675265237818     -2.33054373774825      6.61498335344158
  C   -3.35221180293407     -1.25828791125385      4.08616713141741
  C   -4.56573841314737     -1.37168960741807      3.39386534692332
  C   -5.15015435619615     -0.26809067874477      2.77840085276532
  C   -4.51814303624302      0.97125026889284      2.83985661931267
  C   -3.30312363779788      1.13397789337914      3.51873642708828
  C   -2.66120855986918      2.51679010534971      3.56581878223739
  C   -3.50405989206766      3.49356299662860      4.40730740255107
  C   -2.40242933169134      3.08343874150240      2.15782290376545
  C   -2.74383717001101     -2.50521839719044      4.72023747387143
  C   -2.42568624328607     -3.57749378047424      3.66190467462872
  C   -3.64136248370051     -3.07746213882328      5.83221893487980
  Pd  0.17512524780249      0.21642603641394     -0.04384649901294
  N   -0.12336064366888      0.00582591980214      2.94926333132479
  C   -0.18625427999395      0.14067474602990      4.31380215039099
  H   -2.46918643128057      0.36930673751864      6.82555782341133
  H   -0.37970032326810      0.62659624621331      8.15600010435097
  H   1.83370298968338      0.56423641841699      7.01745289785442
  H   4.60628846173039      2.25580576991441      2.79327417689423
  H   5.91910523348646      0.15499763119262      2.80567598634498
  H   4.95863486141478     -1.90072819779504      3.79769865324581
  H   1.52051752456000     -2.06659149924803      5.31102805342866
  H   1.86308934960225     -3.04740645555627      3.02900532485480
  H   1.98072751575130     -4.27521839079830      4.31517160628038
  H   3.45153167363541     -3.66404275233917      3.53086493754592
  H   4.39874385237125     -2.96859194667775      5.89766756498155
  H   2.92063415323530     -3.65428546469527      6.60767539049303
  H   3.38751734330671     -1.97356504326385      6.96548745137007
  H   1.12188137154521      2.53777310381967      4.16754774175592
  H   2.85048377681685      3.38527721813896      5.75243374967020
  H   2.21073361241631      4.69830355934691      4.73293372871066
  H   3.81184117836835      4.00262105532357      4.39205679442528
  H   2.96375138865848      3.55987749480066      1.92633516357723
  H   1.37677746695443      4.21275514151460      2.37580536366635
  H   1.50136042228845      2.57291141302761      1.68772950674786
  H   -5.05954355538079     -2.34358729405366      3.33305770250248
  H   -6.09670302854048     -0.37502169341373      2.24527509008166
  H   -4.97763687691955      1.83214179956751      2.35041372079764
  H   -1.68566328000340      2.41619471025491      4.06503404837950
  H   -4.49665584509918      3.64878697606925      3.95821349933871
  H   -3.00851578918783      4.47387411509242      4.47413644260135
  H   -3.65446675895208      3.11594830378677      5.42885567689831
  H   -1.77146890196006      2.40827539173876      1.56128236933604
  H   -1.89300487151381      4.05635050197279      2.22705801923420
  H   -3.34313419269237      3.24186830252838      1.60920773908247
  H   -1.79141192847505     -2.21233481513333      5.18652292407811
  H   -3.34170446683524     -3.94340853729660      3.17433255655266
  H   -1.92787232743886     -4.44147138477045      4.12726510528432
  H   -1.76515861335170     -3.18020565159428      2.87893654308435
